## Carcinogen Bioassay of Nitrous Oxide in Mice

Jeffrey M. Baden, M.D.,\* Yashdev R. Kundomal, Ph.D.,† Michael E. Luttrupp, Jr., B.S.,‡  
Richard I. Mazze, M.D.,§ Jon C. Kosek, M.D.¶

A carcinogen bioassay of nitrous oxide ( $N_2O$ ) was performed in groups of male and female Swiss-Webster mice exposed to either air ( $n = 179$ ), 10%  $N_2O$  ( $n = 152$ ), or 40%  $N_2O$  ( $n = 151$ ) for 4 h per day, 5 days per week. After 78 weeks of exposure, there was a 5-week period without treatment following which surviving mice were killed. Mice killed at this time or dying *in extremis* at other times were subjected to complete autopsy unless advanced autolysis or cannibalism precluded examination. Mean body weights for male and female mice in the 10%  $N_2O$  group were the same as those in the air control group throughout the study, whereas they were 5% less in the 40%  $N_2O$  group. Mean organ weights for  $N_2O$ -treated mice were not statistically different from those of control mice. Gross and microscopic examination of tissues revealed a variety of neoplastic and nonneoplastic lesions; however, their presence was unrelated to treatment. (Key words: Anesthetics, gaseous: nitrous oxide. Toxicity: carcinogenicity.)

NITROUS OXIDE ( $N_2O$ ), in continuous clinical use for more than a century, is still the most commonly used inhaled anesthetic in the United States. Initially,  $N_2O$  was considered an inert and nontoxic gas, but recent evidence has definitively linked it to several toxic effects, including hematologic and neurologic dysfunction.<sup>1</sup> In addition, it has putatively been linked to other toxic effects, including carcinogenicity. In a study of dentists and their chairside assistants, a 1.5-fold increase in the general cancer incidence ( $P = 0.06$ ) was noted in women exposed to waste  $N_2O$  compared with unexposed women.<sup>2</sup> The incidence of cancer of the cervix was about 2.5-fold higher than expected ( $P = 0.04$ ). Despite these results, the association between human cancer and  $N_2O$  is very tenuous because of the intrinsic weaknesses of such retrospective surveys of cancer incidence, the generally negative results from surveys of cancer death rates, and the fact that interview-

reported findings were not verified by examination of medical records. Thus, to better define the carcinogenic potential of  $N_2O$ , we undertook a lifetime carcinogen bioassay in mice using a standard animal carcinogenicity protocol.

### Materials and Methods

Two hundred and fifty male and 250 female 3-week-old Swiss-Webster mice\*\* were kept in quarantine for 2 weeks. They were individually ear tagged and divided into three groups. The numbers in each group after elimination of a few mice that failed to thrive during the first few weeks of the study are shown in table 1. Mice were housed not more than four to a cage in polypropylene plastic cages with stainless steel lids and were bedded on ground corn cob.†† They were fed small animal chow‡‡ and were allowed to drink tap water *ad libitum* except during the daily treatment period when food and water were removed. There was a fixed diurnal cycle of 12 h light and 12 h darkness, with  $N_2O$  exposure during the light phase. All mice were inspected daily for disease and were weighed at least every 4 weeks. Group 1 (control group) were exposed to compressed air, Group 2 to 10%  $N_2O$ , and Group 3 to 40%  $N_2O$  for 4 h per day, 5 days per week. Exposures were performed in air-tight, 1000 l capacity, Plexiglas® chambers operating at a negative pressure of 1 cmH<sub>2</sub>O. Groups were exposed at the same time each day in three separate chambers. Exposure to 40%  $N_2O$  was established in preliminary, subchronic studies as a regimen that was likely to provide the maximum tolerated dose (MTD) of  $N_2O$  in the lifetime study, i.e., a dose sufficiently high that it was likely to cause close to but not greater than 10% loss of body weight but unlikely to cause early death.

Animal cages were randomly placed in the chamber. Medical grade  $N_2O$  in oxygen and compressed air was delivered to the chambers through rubber tubing. Initial flows were of the order of 100 l/min until the chambers were charged, at which time maintenance flows of 10 l/min were used. Uniform  $N_2O$  concentration was maintained by a high-volume recirculation fan and was continuously monitored with a Miran 1A-IF® infrared gas analyzer. Tank standards of  $N_2O$  were used to calibrate the gas analyzer before, during, and at the end of each

\* Associate Professor of Anesthesia (SUSM); Staff Anesthesiologist (VAMC).

† Postdoctoral Fellow in Anesthesia/Toxicology (SUSM, VAMC).

‡ Research Assistant (VAMC).

§ Professor of Anesthesia (SUSM); Chief, Anesthesia Service (VAMC).

¶ Professor of Pathology (SUSM); Assistant Chief, Pathology Service (VAMC).

Received from the Departments of Anesthesia and Pathology, Stanford University School of Medicine, Stanford, California, and Anesthesiology and Pathology Services, Veterans Administration Medical Center, Palo Alto, California. Accepted for publication January 7, 1986. Supported by NIH (NIOSH) Grant No. 1R01 OH1177 and the Veterans Administration. Presented in part at the American Society of Anesthesiologists Annual Meeting, New Orleans, Louisiana, October 1984.

Address reprint requests to Dr. Baden: Anesthesia Service (112A), VA Medical Center, Palo Alto, California 94304.

\*\* Hilltop Labs, Chatsworth, California.

†† San I-Cell, Paxton Processing Company, Paxton, Illinois.

‡‡ Wayne Lab Blox, Allied Mills, Inc., Chicago, Illinois.

TABLE 1. Number of Mice in the Carcinogen Bioassay Study

| Treatment            | Sex    | Start | Unscheduled Deaths | Scheduled Killing (88 weeks) |
|----------------------|--------|-------|--------------------|------------------------------|
| Air (control)        | Male   | 91    | 23                 | 68                           |
|                      | Female | 88    | 20                 | 68                           |
| 10% N <sub>2</sub> O | Male   | 75    | 18                 | 57                           |
|                      | Female | 77    | 14                 | 63                           |
| 40% N <sub>2</sub> O | Male   | 76    | 36                 | 40                           |
|                      | Female | 75    | 18                 | 57                           |

exposure. Chamber temperature was maintained at  $25 \pm 2^\circ \text{C}$ , humidity at  $50 \pm 10\%$ , oxygen at 21–23%, and carbon dioxide concentration at less than 0.3%. Air flow and chamber conditions were kept the same for the three chambers. After 78 weeks of exposure, a 5-week period without treatment was allowed to insure that examination for carcinogenicity was not confounded by acute toxic changes. The period was not extended past 5 weeks because natural attrition of mice would have reduced the size of some groups below that needed for adequate statistical comparisons. Following this period, surviving animals were killed by carbon dioxide overdose.

All animals killed at the scheduled time or dying *in extremis* at other times were subjected to complete autopsy examinations. The only exceptions were eight mice in which cannibalism or advance autolysis precluded examination. The procedures used for the gross autopsy were the same as those recommended by the National Cancer Institute<sup>§§</sup> and have previously been described in detail.<sup>3</sup>

More than 40 tissues were examined *in situ*, then dissected from the carcass, incised, and reexamined before being fixed in 10% neutral buffered formalin. Liver, spleen, kidneys, and testes were weighed fresh. After fixation, tissues were again examined grossly, and 32 routine

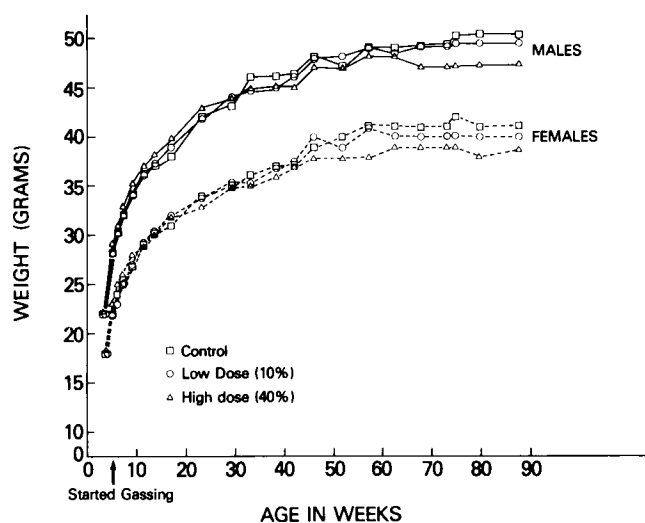

FIG. 1. Mean body weights for male and female mice throughout the study. Mice exposed to 40% N<sub>2</sub>O consistently weighed about 5% less than those exposed only to air.

sections from different organs and all abnormal tissues were processed for microscopic examination. Included in this group were bone marrow and blood smear (the latter for red blood cell, differential white blood cell, reticulocyte, and platelet counts). Tissue sections were cut at 4 to 6  $\mu\text{m}$  and stained with hematoxylin and eosin. Microscopic examinations were performed by a pathologist experienced in mouse histology. Examiners were unaware of the treatment groups of the mice at the time of all examinations. Consultation was sought from other pathologists when a histopathologic diagnosis was in doubt.

Intergroup comparisons were made using analysis of variance with post hoc tests, probit analysis, and Chi-square test as appropriate;  $P < 0.05$  was considered statistically significant.

## Results

Mean body weights for males and females in Group 2 (10% N<sub>2</sub>O) were similar to those in Group 1 (control) throughout the study, whereas they were about 5% less

§§ Sontag JM, Page NT, Saffioti U: Guidelines for carcinogen bioassay in small rodents. NCI-CG-TR-1, Technical Report Series No. 1 DHEW publication no. (NIH) 76-801, 1976.

TABLE 2. Mean  $\pm$  SD of Selected Organ Weights (g)\*

| Organ        | Control         |                 | 10% N <sub>2</sub> O |                 | 40% N <sub>2</sub> O |                 |
|--------------|-----------------|-----------------|----------------------|-----------------|----------------------|-----------------|
|              | M               | F               | M                    | F               | M                    | F               |
| Liver        | 2.53 $\pm$ 0.49 | 1.84 $\pm$ 0.37 | 2.43 $\pm$ 0.40      | 1.70 $\pm$ 0.29 | 2.60 $\pm$ 0.64      | 1.64 $\pm$ 0.18 |
| Spleen       | 0.16 $\pm$ 0.09 | 0.19 $\pm$ 0.17 | 0.16 $\pm$ 0.11      | 0.16 $\pm$ 0.13 | 0.17 $\pm$ 0.15      | 0.15 $\pm$ 0.09 |
| Right kidney | 0.47 $\pm$ 0.10 | 0.29 $\pm$ 0.06 | 0.47 $\pm$ 0.08      | 0.29 $\pm$ 0.05 | 0.46 $\pm$ 0.07      | 0.29 $\pm$ 0.04 |
| Left kidney  | 0.46 $\pm$ 0.10 | 0.29 $\pm$ 0.05 | 0.47 $\pm$ 0.09      | 0.29 $\pm$ 0.05 | 0.46 $\pm$ 0.07      | 0.30 $\pm$ 0.04 |
| Right testis | 0.08 $\pm$ 0.02 |                 | 0.08 $\pm$ 0.02      |                 | 0.08 $\pm$ 0.02      |                 |
| Left testis  | 0.09 $\pm$ 0.02 |                 | 0.08 $\pm$ 0.02      |                 | 0.07 $\pm$ 0.02      |                 |

\* Intergroup comparison performed by analysis of variance.

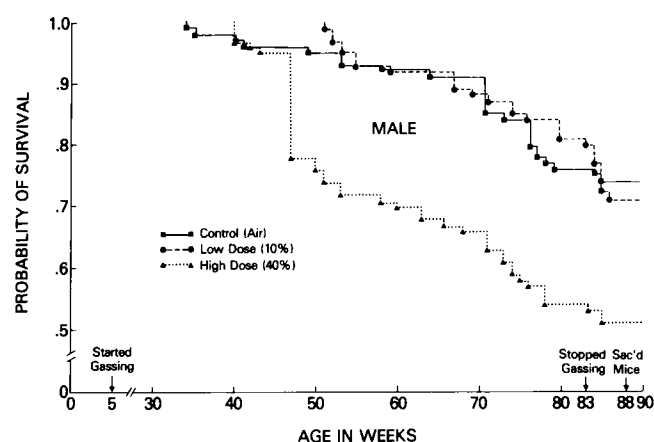

FIG. 2. Survival rates for male mice. The survival rates for mice exposed to air was not statistically different from those exposed to 10%  $N_2O$  (Group 2) throughout the study. The percentage of mice surviving to the time of scheduled sacrifice in the 40%  $N_2O$  Group (3) was less than that of mice in the control group (1) because of the accidental loss of 12 mice during week 42 of gassing. Otherwise, the survival rates in Group 3 were the same as in the other groups.

for Group 3 (40%  $N_2O$ ) after about week 60 of gassing for males and week 40 for females (fig. 1). No other gross toxic effects of treatment were noted. Mean organ weights of  $N_2O$ -treated mice were not statistically different from those of control mice (table 2) nor were mean organ weights expressed as a percentage of body weight different from controls.

The percentages of male and female mice surviving the study are shown in figures 2 and 3, respectively. On one day during week 42 of gassing, an event occurred that led to the death of 12 male and 2 female mice exposed to 40%  $N_2O$ . There was a failure of the air conditioner in the building in which the exposure chambers were kept. The result was an undue rise in temperature during the last 2 h of gassing, especially in the 40%  $N_2O$  chamber.

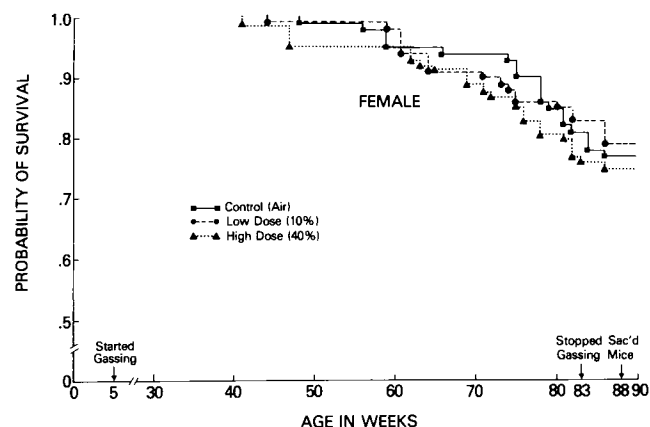

FIG. 3. Survival rates for female mice. The survival rates were not statistically different among the groups throughout the study.

TABLE 3. Percentage of Mice with Tumors Observed by Gross Examination\*

| Tumors        | Control |      | 10% $N_2O$ |      | 40% $N_2O$ |      |
|---------------|---------|------|------------|------|------------|------|
|               | M       | F    | M          | F    | M          | F    |
| Lung adenomas | 37.4    | 28.4 | 37.3       | 31.2 | 21.1       | 41.3 |
| Liver tumors  | 12.1    | 4.5  | 10.6       | 2.6  | 7.6        | 2.7  |
| Others        | 9.9     | 21.6 | 13.3       | 14.3 | 10.5       | 14.6 |

\* Intergroup comparisons performed by chi-square test.

Mice that survived this event showed no long-term sequelae. The reason that more males died than females is unknown although, in general, males tend to be more debilitated in long-term studies because of infection from fighting. When mice that died from hyperpyrexia were excluded from the probit analysis, the survival rates for all groups throughout the study were the same.

Gross and microscopic examination of tissues revealed a variety of nonneoplastic lesions including ovarian cysts, cholecystitis, bladder stones, and testicular atrophy. Their presence was unrelated to treatment. In general, there was no microscopic evidence of cellular damage and, in particular, a detailed examination of blood smears and bone marrow sections showed no evidence of megaloblastic changes or bone marrow depression.

The first neoplastic lesion appeared 26 weeks after the start of treatment, and numerous other tumors appeared throughout the study (table 3). As in similar studies with other anesthetics,<sup>3-6</sup> most of the tumors in both control and test animals were either lung adenomas of alveolar cell origin or liver tumors of the basophilic hepatocellular adenoma type. There were no statistical differences among the groups either in the total number of tumors or in the number of tumors of a particular cell type. It should be noted, however, that the background incidence of lung adenomas in this study was high and, thus, the statistical power for the analysis of differences among the groups for this tumor type was low.

## Discussion

Nitrous oxide is the most widely used inhaled anesthetic. In the United States alone, it is estimated that 20 million surgical and 4.5 million dental patients receive  $N_2O$  each year.<sup>11</sup> Furthermore, at least 200,000 operating, dental, and veterinary personnel are chronically exposed to trace concentrations of  $N_2O$ .<sup>12</sup> In addition to its medical use,  $N_2O$  is used as a propellant in spray cans

<sup>11</sup> US Department of Health, Education and Welfare: NIOSH criteria for a recommended standard: Occupational exposure to waste anesthetic gases and vapors. DHEW publication no. (NIOSH) 77-140. Public Health Service, Center for Disease Control, (NIOSH), March 1977.

and aerosols and for several other commercial and industrial purposes. It is also the most abundant atmospheric nitrogen compound, with a mean concentration of about 0.25 ppm in clean and 1.0 ppm in polluted air.<sup>7</sup> Thus, if N<sub>2</sub>O has carcinogenic or other toxic potential, its widespread use and distribution would make it a considerable public health hazard.

In the present study, chronic administration of high concentrations of N<sub>2</sub>O had no morphologic or functional effects on the mouse hemopoietic system. This is surprising because N<sub>2</sub>O is known to inactivate vitamin B<sub>12</sub> very rapidly in rodents and to produce a number of biochemical derangements, including interference with normal methionine and thymidine synthesis.<sup>8</sup> Nevertheless, the results agree with our previous study in which no adverse hemopoietic effects were observed after 14 weeks of exposure of Swiss-Webster mice to 50% N<sub>2</sub>O for 4 h per day, 5 days per week.<sup>9</sup> Other species, such as bats,<sup>10</sup> monkeys,<sup>11</sup> and humans,<sup>12</sup> not only show the biochemical effects of inactivation of vitamin B<sub>12</sub> but also develop megaloblastic anemia and subacute combined degeneration of the cord. The reasons for the different functional effects of N<sub>2</sub>O in several species are unknown.

Although there are species differences in some types of toxicity, numerous studies over the last two decades have indicated that results of lifetime studies in small rodents predict the carcinogenic potential of a drug in humans.<sup>13</sup> For example, aflatoxin B<sub>1</sub>, vinyl chloride, benzidine, and diethylstilbestrol have about the same carcinogenic potential in at least one species of rodent as in humans. Thus, the lack of carcinogenicity of N<sub>2</sub>O in our study is encouraging, especially considering our protocol involved lifetime exposure, which is needed to test adequately the carcinogenic potential of any drug.<sup>14</sup>

Two previous animal studies have been performed to determine whether N<sub>2</sub>O is a carcinogen. Eger *et al.*<sup>5</sup> exposed Swiss-ICR mice to 12.5% or 50% N<sub>2</sub>O for 2-h periods both *in utero* during the last half of pregnancy (four exposures) and after delivery (24 exposures at 2- to 3-day intervals). They found no evidence of carcinogenic activity. However, as previously discussed,<sup>4</sup> two aspects of this study lead to a low confidence in the significance of the negative results. First, the total dosage of N<sub>2</sub>O was very low and, second, mice were exposed only at the beginning of their lives as opposed to the accepted protocol of exposure for at least 18 months. In the second study, Coate *et al.*<sup>6</sup> exposed groups of Fischer-344 rats either to 1 ppm

halothane and 50 ppm N<sub>2</sub>O, or to 10 ppm halothane and 500 ppm N<sub>2</sub>O for 7 h per day, 5 days per week for 104 weeks; no carcinogenic activity was seen. Because the number of rats and the dosages used were small, the statistical power of this study is low. Nevertheless, these studies, together with our study in which N<sub>2</sub>O was administered for 18 months at the MTD suggest that N<sub>2</sub>O has little or no carcinogenic potential.

## References

1. Chanarin I: Cobalamins and nitrous oxide: A review. *J Clin Pathol* 33:909-916, 1980
2. Cohen EN, Brown BW, Wu ML, Whitcher CE, Brodsky JB, Gift HC, Greenfield W, Jones TW, Driscoll EJ: Occupational disease in dentistry and chronic exposure to trace anesthetic gases. *J Am Dent Assoc* 101:21-31, 1980
3. Baden JM, Mazze RI, Wharton RS: Carcinogenicity of halothane in Swiss/ICR mice. *ANESTHESIOLOGY* 51:20-26, 1979
4. Baden JM, Egbert B, Mazze RI: Carcinogen bioassay of enflurane in mice. *ANESTHESIOLOGY* 56:9-13, 1982
5. Eger EI II, White AE, Brown CL: A test of the carcinogenicity of enflurane, isoflurane, halothane, methoxyflurane and nitrous oxide in mice. *Anesth Analg* 57:678-694, 1978
6. Coate WB, Ulland BM, Lewis TR: Chronic exposure to low concentrations of halothane-nitrous oxide. Lack of carcinogenic effect in the rat. *ANESTHESIOLOGY* 50:306-309, 1979
7. Fishbein L: Atmospheric Mutagens. I. Sulphur oxides and nitrogen oxides. *Mutat Res* 32:309-330, 1976
8. Baden JM, Rice SA, Serra M, Kelley M, Mazze RI: Methionine and thymidine syntheses in pregnant rats exposed to nitrous oxide. *Anesth Analg* 62:738-741, 1983
9. Rice SA, Mazze RI, Baden JM: Effects of subchronic intermittent exposure to nitrous oxide in Swiss Webster mice. *J Environ Pathol Toxicol* 6:271-281, 1985
10. van der Westhuyzen J, Fernandes-Costa J, Metz J: Cobalamin inactivation by nitrous oxide produces severe neurological impairment in fruit bats: Protection by methionine and aggravation by folates. *Life Sci* 31:2001-2010, 1982
11. Scott JM, Wilson P, Dinn JJ, Weir DG: Pathogenesis of subacute combined degeneration: A result of methyl-group deficiency. *Lancet* II:334-337, 1981
12. Amos RJ, Amess JAL, Nancekivell DG, Rees GM: Prevention of nitrous oxide induced megaloblastic changes in bone marrow using folic acid. *Br J Anaesth* 56:103-107, 1984
13. Williams GM, Reiss B, Weisburger JH: A comparison of the animal and human carcinogenicity of environmental, occupational, and therapeutic chemicals, Mechanisms and Toxicity of Chemical Carcinogens and Mutagens. Edited by Flamm WG, Lorentzer RJ. Princeton, Princeton Scientific Publishing, 1985, pp 207-248
14. Littlefield NA, Farmer JH, Gaylor DW: Effect of dose and time in a long-term, low-dose carcinogenic study. *J Environ Pathol Toxicol* 3:17-34, 1979
